# Supplementary material for: Phase stability and the interface structure of a nanoscale Si crystallite in Al-based alloys
Source: Royal Society of Chemistry journal article supplement (doi:10.1039/d2nr02581g), 2022-01-01
Supplement: d2nr02581g1.pdf [file d2nr02581g1.pdf]

## ***Supporting Information***

### **Phase stability and interface structure of nanoscale Si crystallite in Al-based alloys**

Lu Lu,<sup>a,b</sup> Yao-Xiang Geng,<sup>c</sup> Ying-Min Wang,<sup>\*d</sup> Jian-Bing Qiang<sup>d</sup> and Shao-Bo Mi<sup>\*a,b,e</sup>

*<sup>a</sup>Ji Hua Laboratory, Foshan 528200, China*

*<sup>b</sup>Foshan University, Foshan 528225, China*

*<sup>c</sup>School of Materials Science and Engineering, Jiangsu University of Science and  
Technology, Zhenjiang 212003, China*

*<sup>d</sup>School of Materials Science and Engineering, Dalian University of Technology,  
Dalian 116024, China*

*<sup>e</sup>School of Materials Science and Engineering, Xi'an Jiaotong University, Xi'an  
710049, China*

---

\* E-mail: [mi\\_jhlab@163.com](mailto:mi_jhlab@163.com), [apwangym@dlut.edu.cn](mailto:apwangym@dlut.edu.cn)

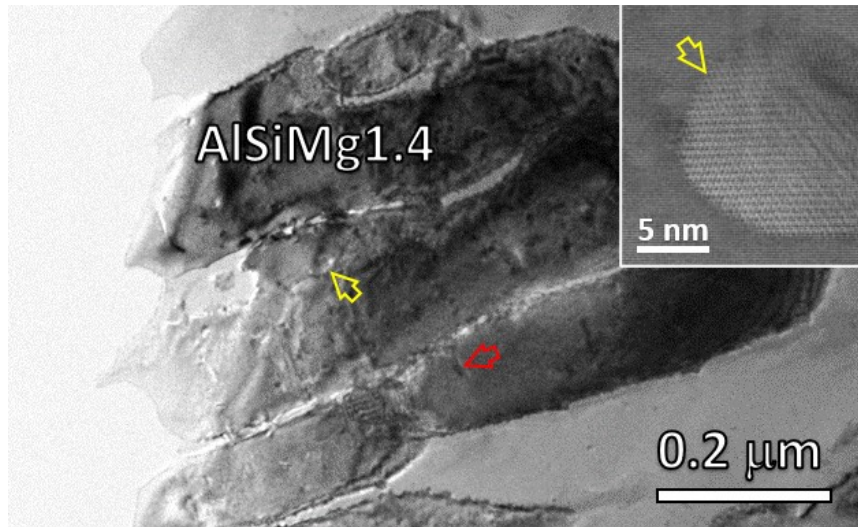

**Figure S1. A low-magnification TEM image of Al-8.2Si-1.4Mg (wt. %) (AlSiMg1.4) sample.** In the  $\alpha$ -Al matrix, the nanoscale Si precipitates appear, as demonstrated by a red arrow. During our TEM/STEM observations, it was found the population of nanoscale Si precipitate is low. In addition, apart from nanoscale Si precipitates, the nanoscale precipitates with an unknown structure exist, as indicated by a yellow arrow. The HAADF-STEM image of such precipitates is inserted in the micrograph.

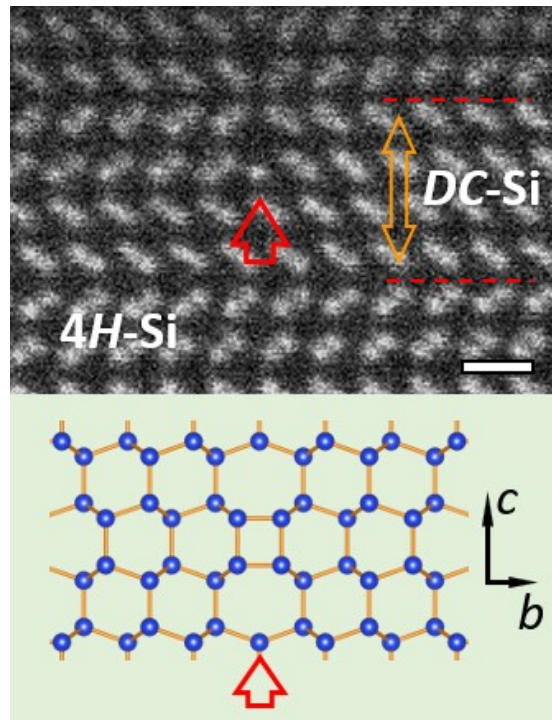

**Figure S2. The HAADF-STEM image of the  $(1\bar{1}00)[0001]_{4H-Si}$  twin and the corresponding structural model.** The HAADF-STEM image (scale bar: 0.5 nm) is viewed along the  $[11\bar{2}0]$  direction of  $4H-Si$ . Within the  $4H-Si$  matrix, the stacking sequence of the  $DC-Si$  structure appears, as shown by a double-head arrow, which results in the formation of  $(1\bar{1}00)[0001]_{4H-Si}$  twin. At the twin boundary (TB), a structural unit of two seven-membered rings separated by one four-membered ring appears periodically, as shown by vertical red arrows.
